# Supplementary material
Source: HighWire-hosted journal article supplement (http://cmajopen.ca/highwire/filestream/81115/field_highwire_adjunct_files/1/2017-0052-2-at.pdf)
Supplement: 2017-0052-2-at.pdf [file 2017-0052-2-at.pdf]

Appendix 2, supplemental Figure S1 (as supplied by the authors)

Participant flow diagram

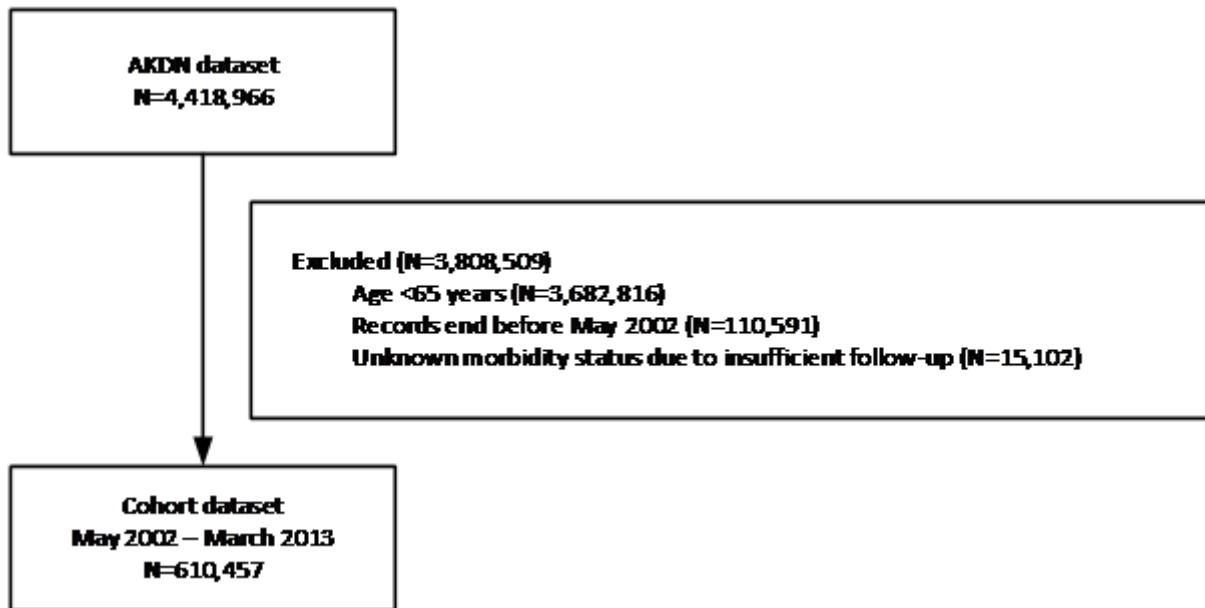

AKDN Alberta Kidney Disease Network
